# Supplementary material for: A BAHD acyltransferase contributes to the biosynthesis of both ethyl benzoate and methyl benzoate in the flowers of Lilium oriental hybrid ‘Siberia’
Source: PubMed Central journal article supplement (PMC10570747; doi:10.3389/fpls.2023.1275960), 2023-09-29
Supplement: DataSheet_1.pdf [file DataSheet_1.pdf]

## Supplementary Materials

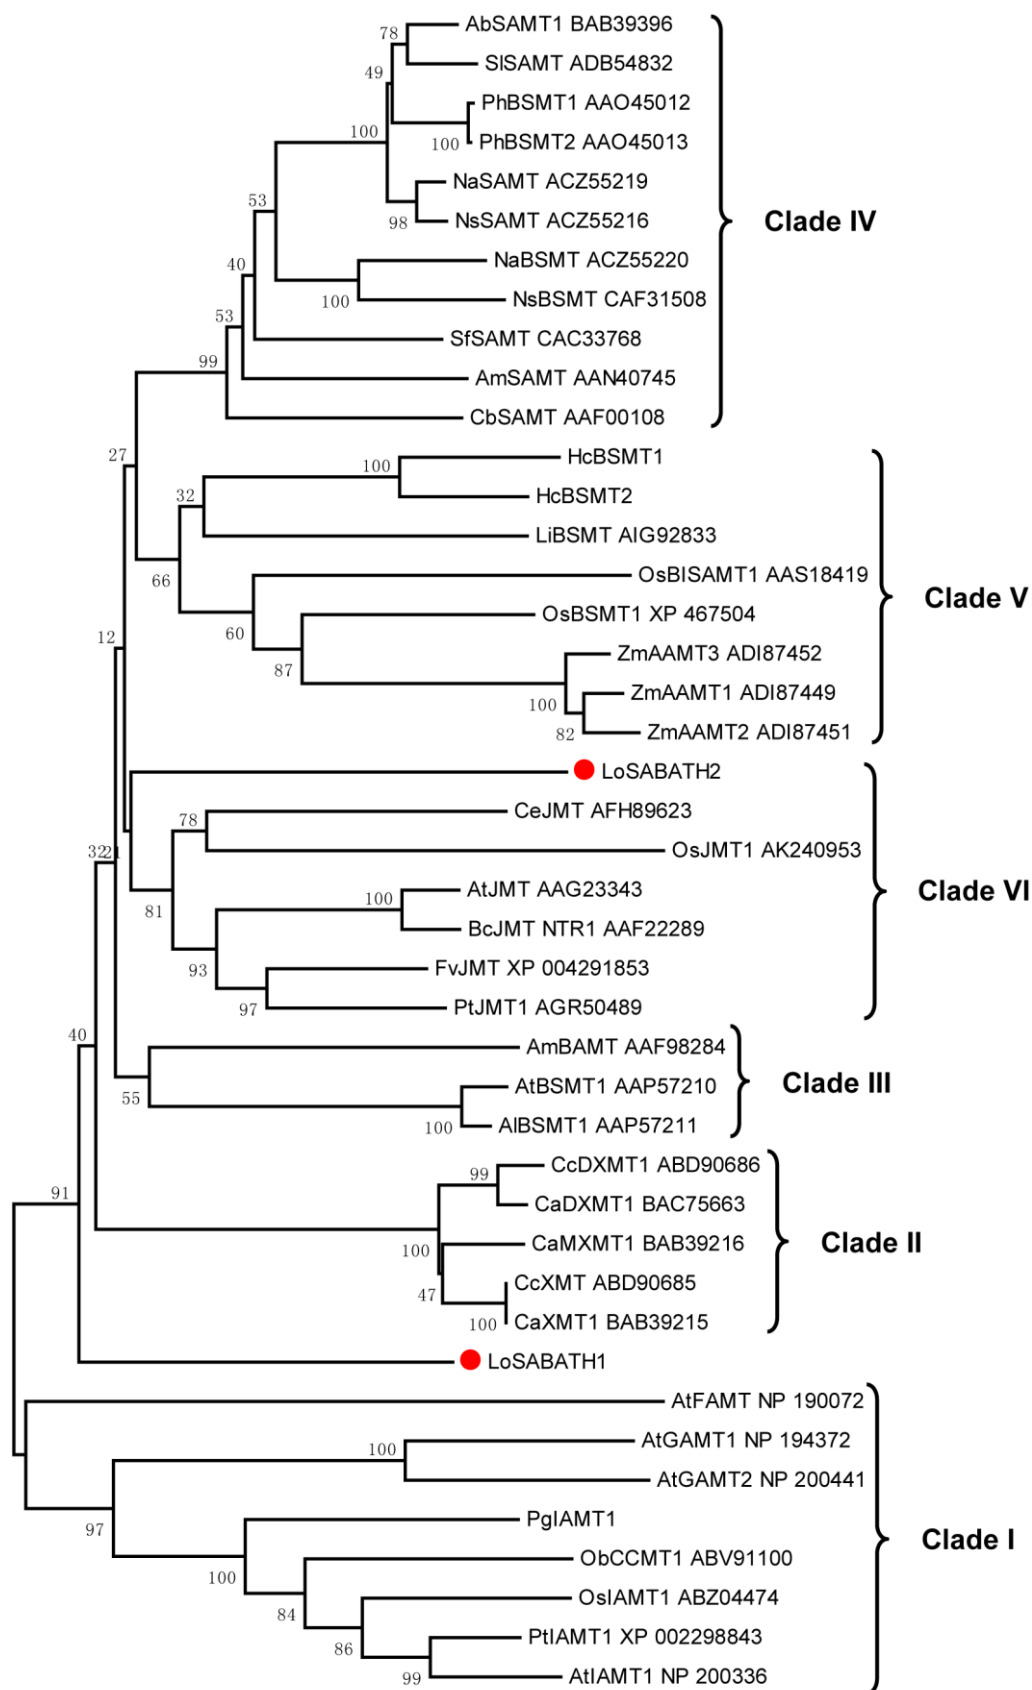

**Supplementary Figure 1.** Phylogenetic analysis of SABATHs in *Lilium* ‘Siberia’. The phylogenetic tree was constructed based on protein sequences of functionally characterized members in the SABATH family using the neighbour-joining method. The members of the plant SABATH family are classified into six clades (Clade I through Clade VI). The SABATH proteins identified from the lily transcriptome are labelled with red solid circles. The scale bar indicates 10% sequence divergence. The numbers at each branch indicate bootstrap percentages from 1,000 replicates. GenBank accession numbers are shown behind their corresponding enzyme name. Ab, *Atropa belladonna*; Al, *Arabidopsis lyrata*; Am, *Antirrhinum majus*; At, *A. thaliana*; Bc, *Brassica campestris*; Ca, *Coffea arabica*; Cb, *Clarkia breweri*; Cc, *C. canephora*; Ce, *Cymbidium ensifolium*; Fv, *Fragaria vesca*; Hc, *Hedychium coronarium*; Li, *Lilium* ‘Yelloween’; Lo, *Lilium* oriental hybrid; Na, *Nicotiana alata*; Ns, *N. suaveolens*; Ob, *Ocimum basilicum*; Os, *Oryza sativa*; Pg, *Picea glauca*; Ph, *Petunia hybrid*; Pt, *Populus trichocarpa*; Sf, *Stephanotis floribunda*; Sl, *Solanum lycopersicum*; Zm, *Zea mays*.

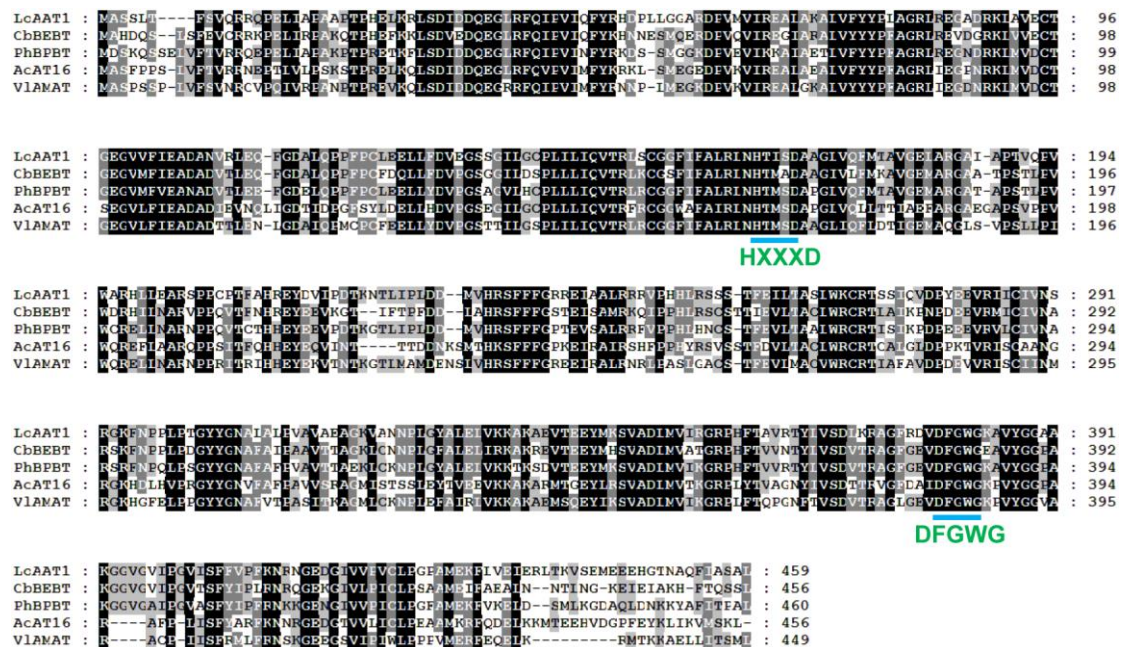

**Supplementary Figure 2.** Alignment of the amino acid sequence of LoAAT1 with representative alcohol acyltransferases. Amino acid residues shaded in black, grey and light grey represent 100, 80 and 60% conserved identity, respectively. Dashes indicate gaps inserted for optimal alignment. The conserved HXXXD and DFGWG motifs of the BAHD family are underlined.

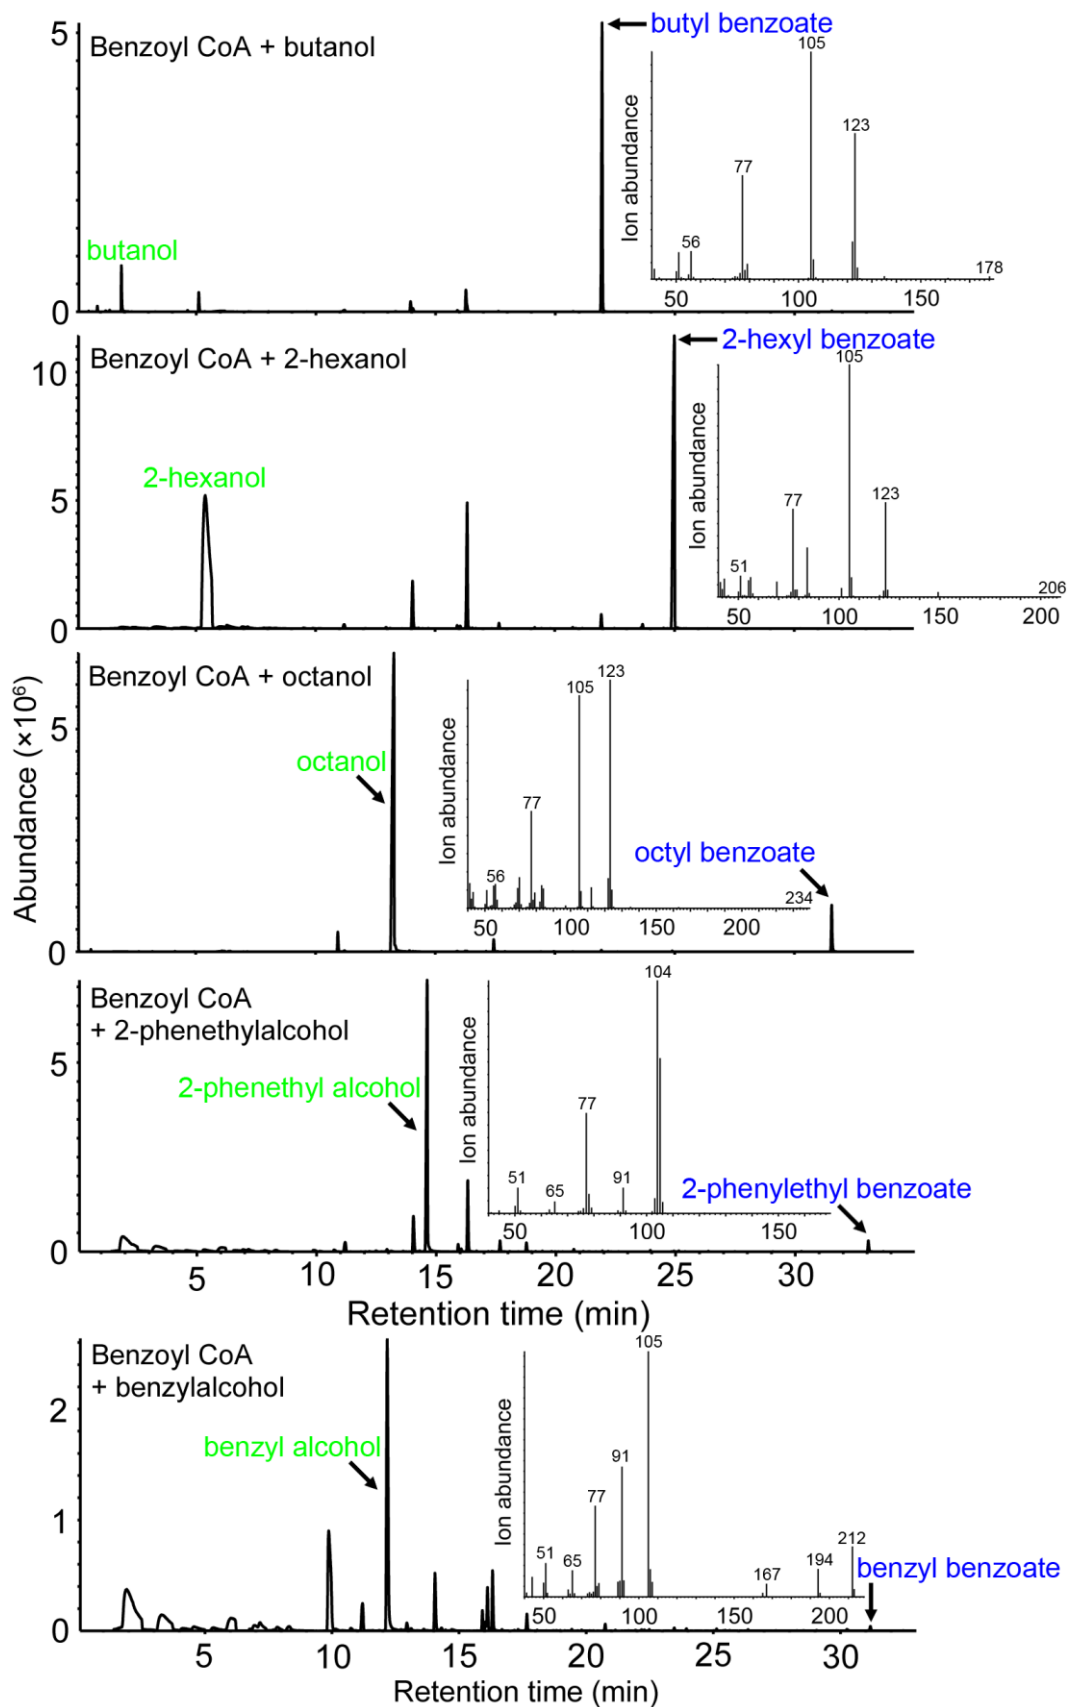

**Supplementary Figure 3.** GC-MS analysis of products generated by recombinant LoAAT1 incubated with benzoyl-CoA and different alcohol substrates. The alcohol substrates are shown in green, while the benzoylated products whose mass spectra are displayed as insets are shown in blue.

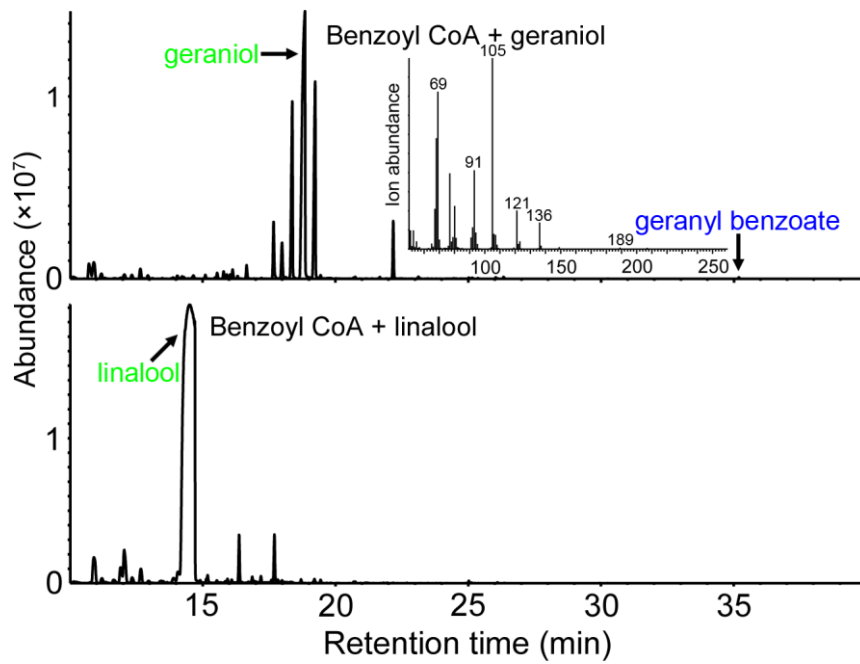

**Supplementary Figure 4.** GC-MS analysis of products generated by recombinant LoAAT1 incubated with benzoyl-CoA and the monoterpene alcohol substrates. The alcohol substrates are shown in green while the benzoylated product whose mass spectrum is displayed as an inset is shown in blue.

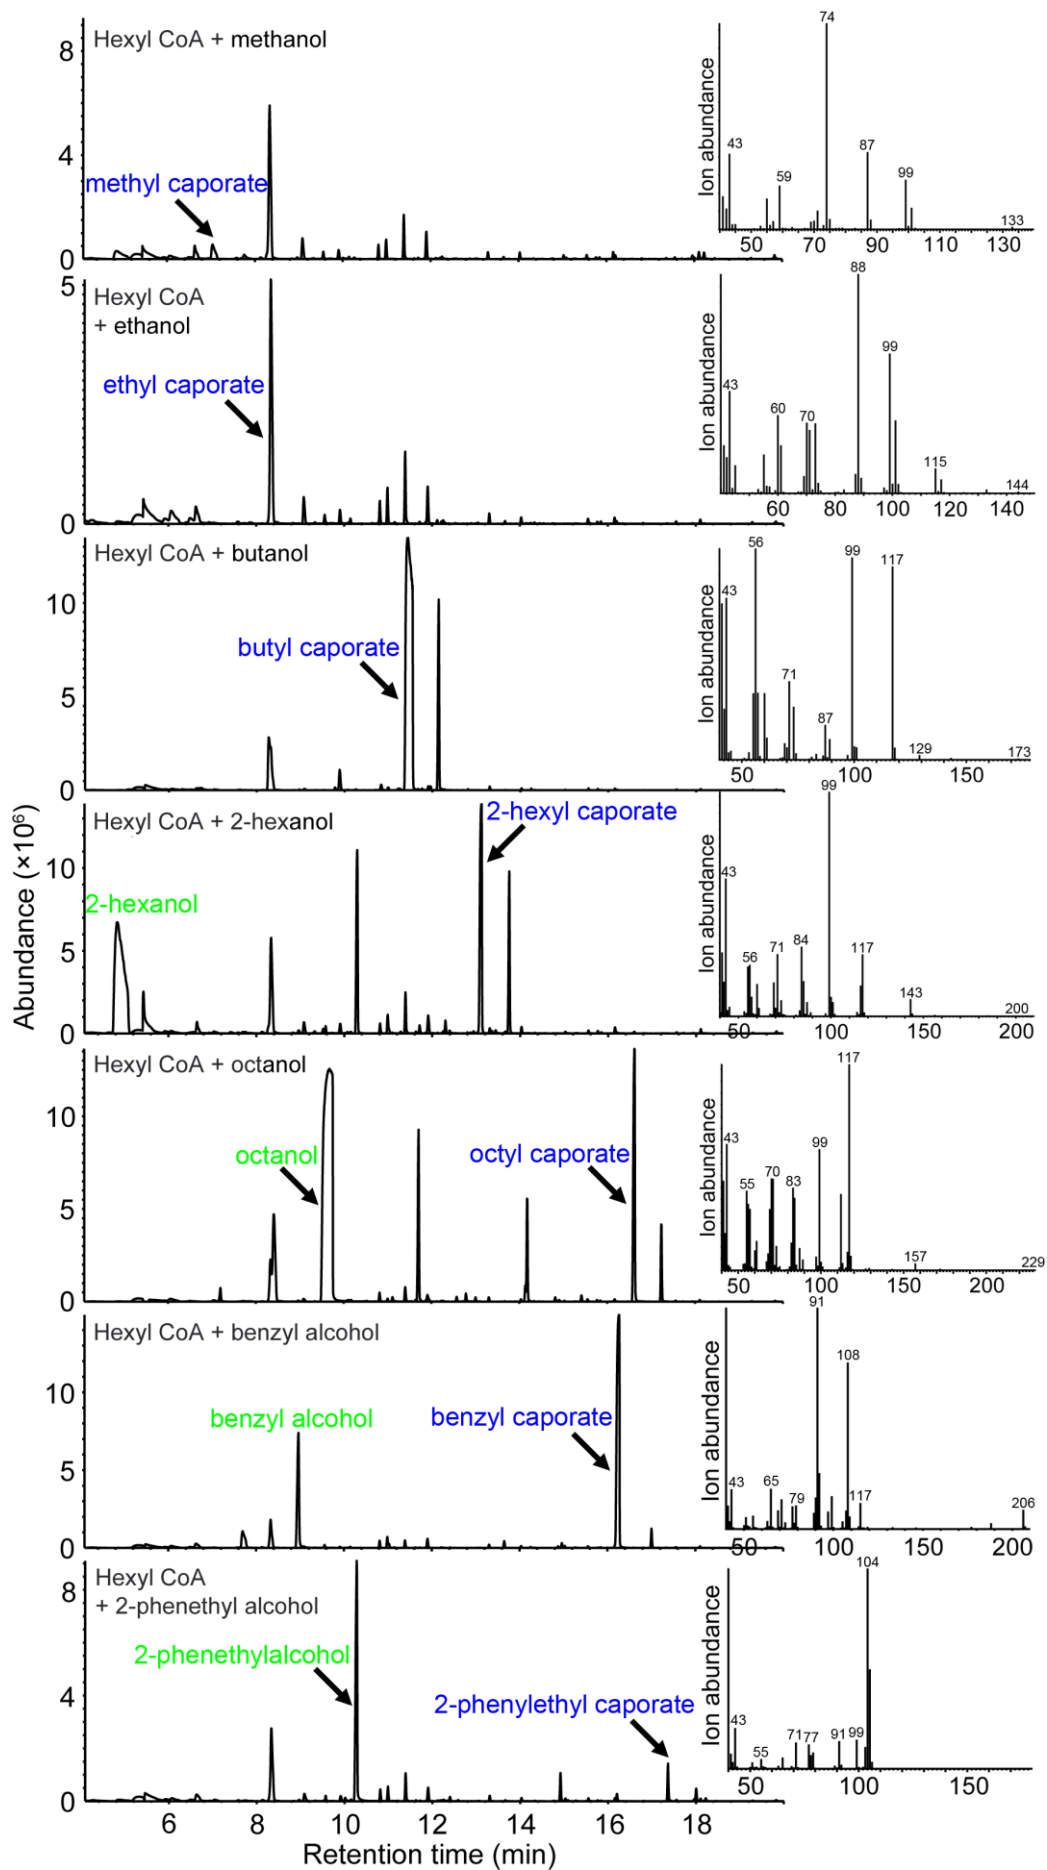

**Supplementary Figure 5.** GC-MS analysis of products generated by recombinant LoAAT1 incubated with hexyl-CoA and different alcohol substrates. The alcohol substrates are shown in green while the hexylated products whose mass spectra are displayed as insets are shown in blue.

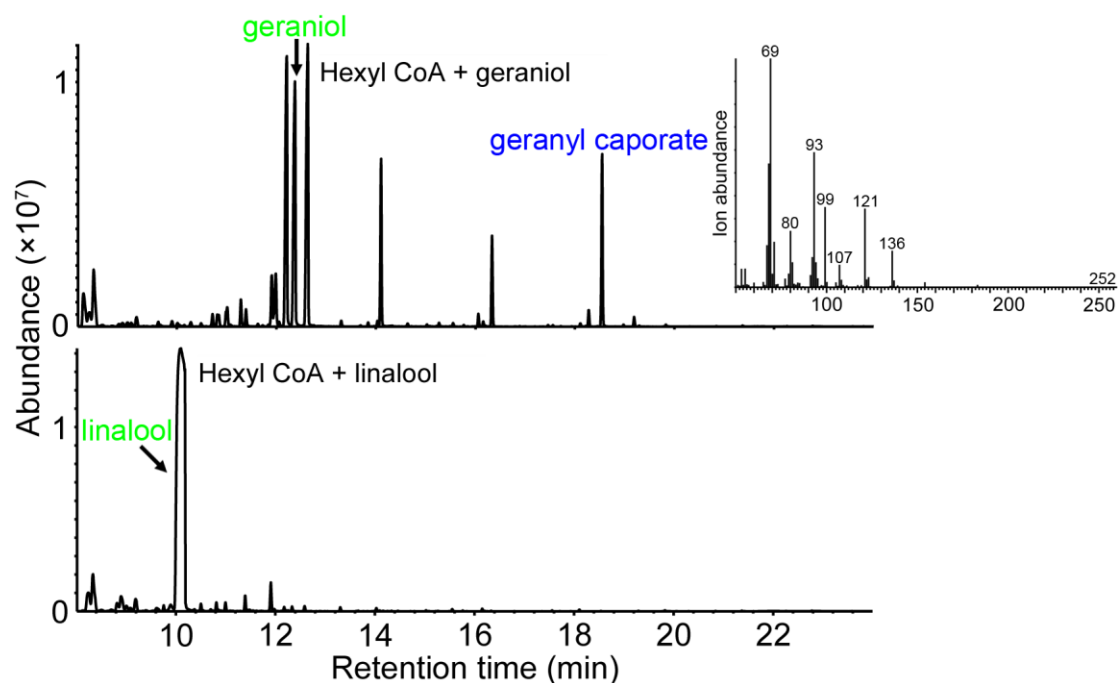

**Supplementary Figure 6.** GC-MS analysis of products generated by recombinant LoAAT1 incubated with hexyl-CoA and the monoterpene alcohol substrates. The alcohol substrates are shown in green while the hexylated product whose mass spectrum is displayed as an inset are shown in blue.

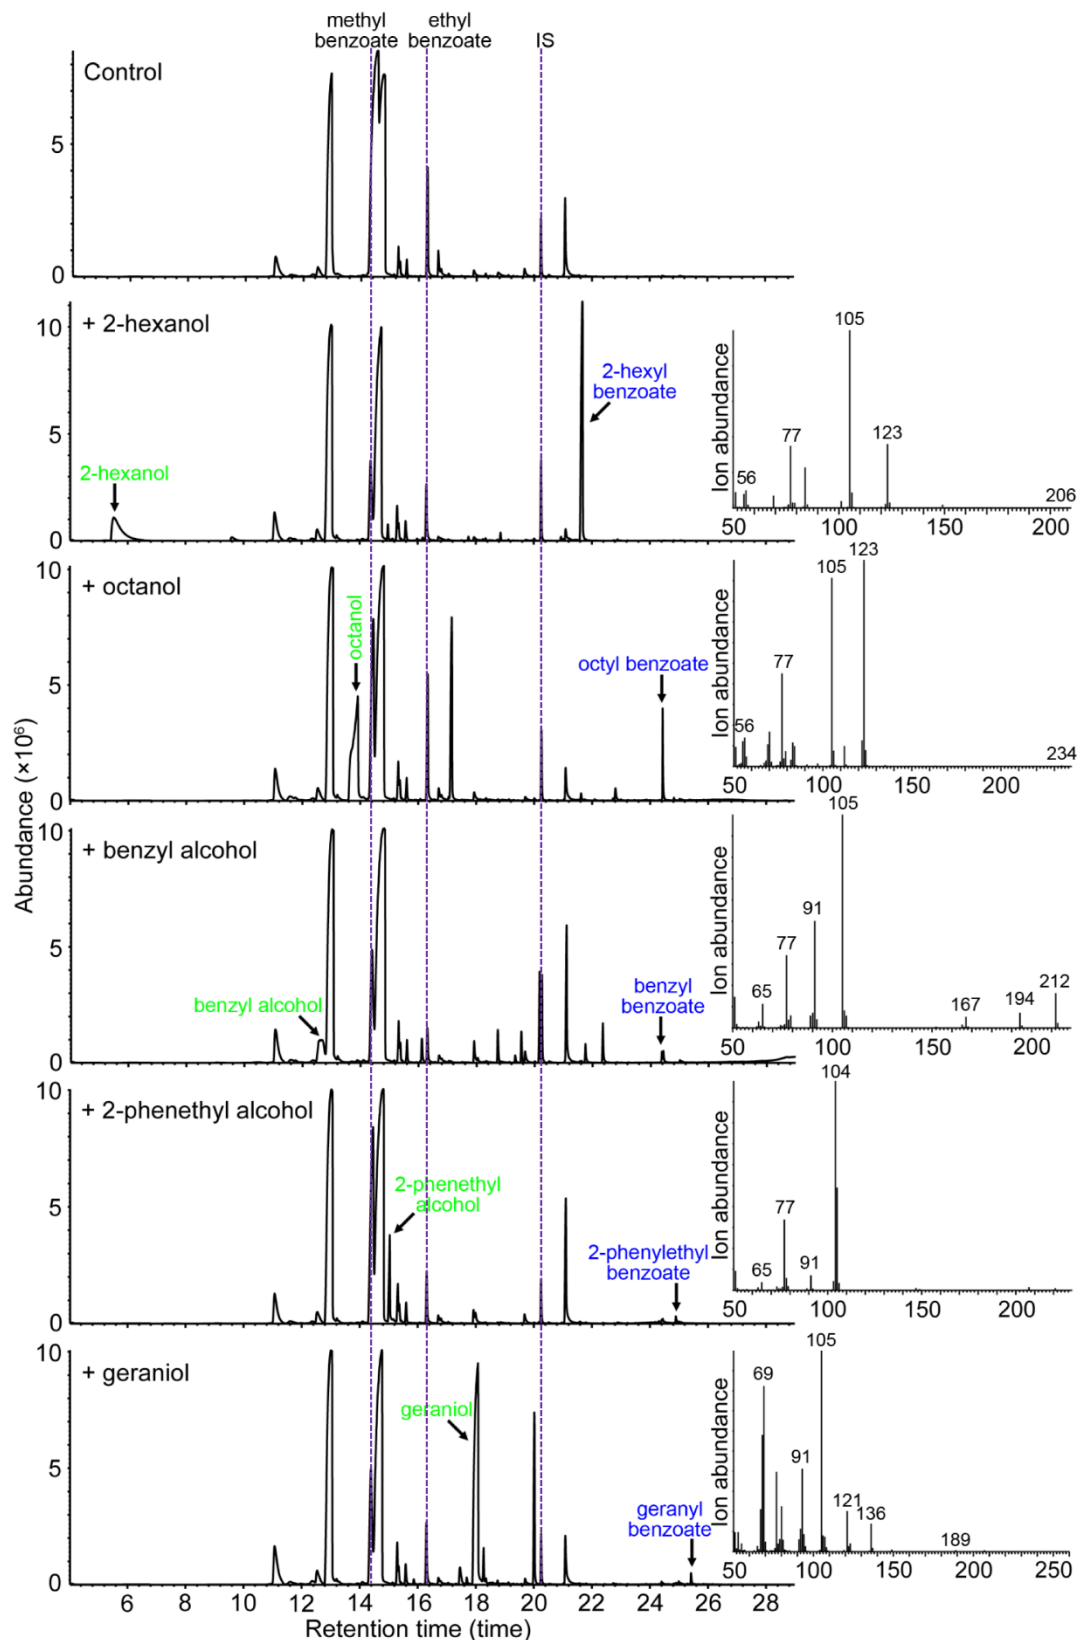

**Supplementary Figure 7.** Total ion chromatogram of volatiles after infiltration of different alcohol substrates into inner tepals of *Lilium* 'Siberia'. The chromatographic peaks of infiltrated alcohol (green font) and newly formed benzoylated products (blue font) are marked by arrows. The mass spectra of the benzoylated products are displayed as insets. IS: internal standard.

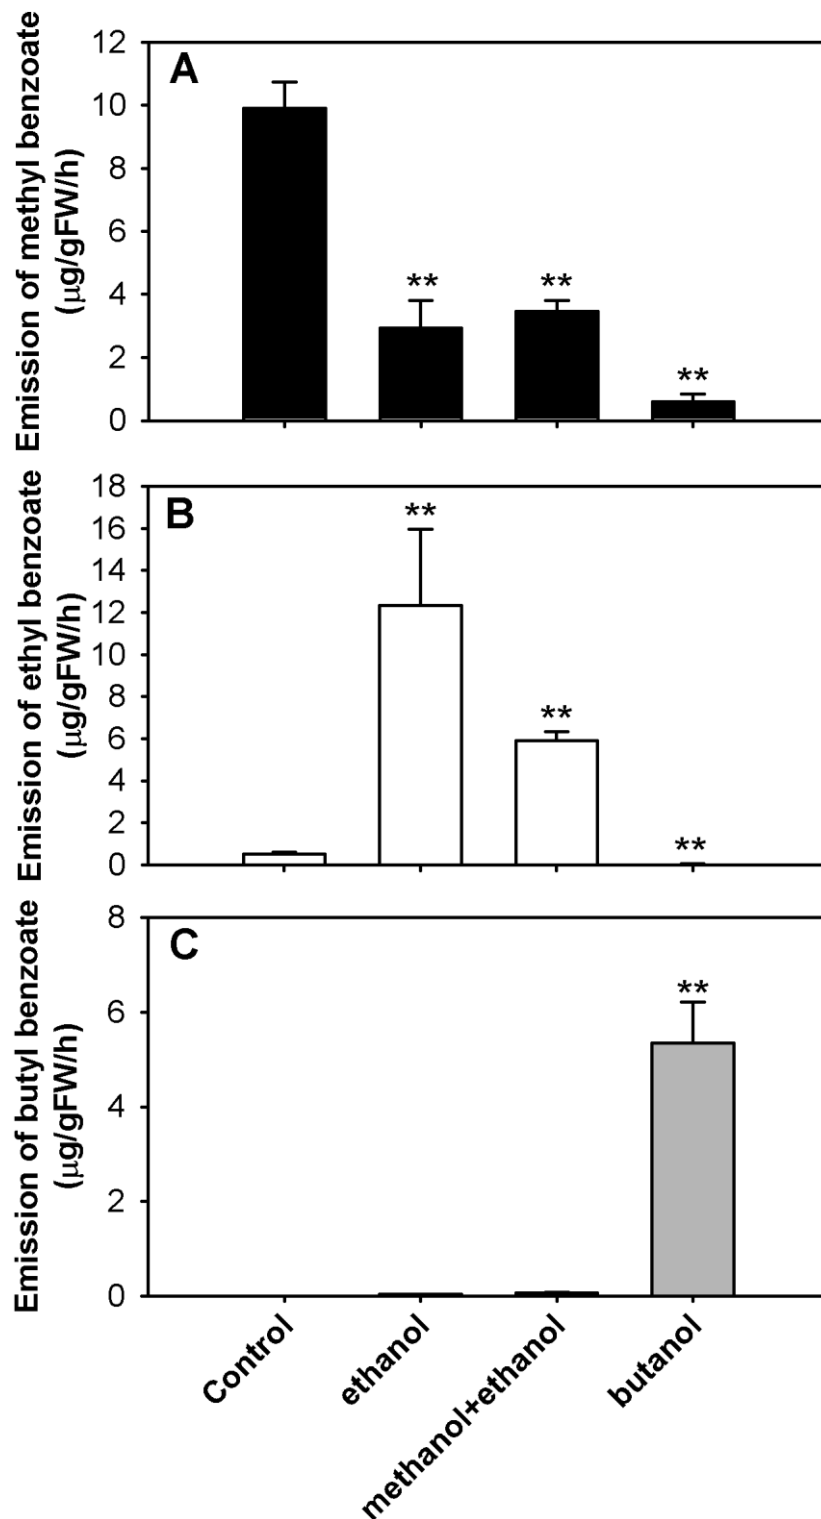

**Supplementary Figure 8.** Emission of methyl benzoate (**A**), ethyl benzoate (**B**) and butyl benzoate (**C**) after infiltration of different alcohol substrates into inner tepals of *Lilium* ‘Siberia’. Error bars indicate the standard deviation of three biological replicates. Asterisks represent significant differences between treatments and control by Student’s *t* test (\*\* $P < 0.01$ ).



**Supplementary Table 1.** Summary of the *Lilium* ‘Siberia’ transcriptome.

|                              |            |
|------------------------------|------------|
| Total number of raw reads    | 20,621,404 |
| Total base pairs (Gbp)       | 4.17       |
| GC content (%)               | 50.35      |
| Q20 (%)                      | 92.42      |
| Total number of unigenes     | 29,837     |
| Mean length of unigenes (bp) | 831        |
| N50 (bp)                     | 1,269      |

**Supplementary Table 2.** Summary of DGE sequencing during tepal development.

| <b>Description</b>                           | <b>Bud</b> | <b>BM_L</b> | <b>BM_D</b> |
|----------------------------------------------|------------|-------------|-------------|
| Total raw reads                              | 12,023,078 | 8,973,373   | 8,824,284   |
| Total bases (G)                              | 1.21       | 0.91        | 0.89        |
| Q20 (%)                                      | 94.35      | 93.29       | 93.70       |
| GC content (%)                               | 52.15      | 50.67       | 49.97       |
| Total mapped reads                           | 9,007,663  | 7,609,257   | 7,420,112   |
| Total mapped reads /Total<br>clean reads (%) | 74.92      | 84.80       | 84.01       |

BM\_L and BM\_D represent the tepals in the blooming stage at the daytime (16:00) and dark (4:00 AM), respectively. DGE: digital gene expression profiling.

**Supplementary Table 3.** Analysis of putative genes related to benzenoid biosynthesis.

| Name          | Gene ID              | Description                           | Full<br>-length | Amino<br>acid | Homolog            | Identity<br>(%) | Expression quantity (RPKM) |                 |                |
|---------------|----------------------|---------------------------------------|-----------------|---------------|--------------------|-----------------|----------------------------|-----------------|----------------|
|               |                      |                                       |                 |               |                    |                 | Bud                        | BM_L            | BM_D           |
| LoPAL1        | Unigene.26868        | Phenylalanine ammonialyase            | 2388            | 701           | AtPAL1 (NP_181241) | 78.61           | 0.33                       | 834.83          | 391.09         |
| LoPAL2        | Unigene.29838        | Phenylalanine ammonialyase            | 2379            | 713           | AtPAL1 (NP_181241) | 81.07           | 365.52                     | 2194.72         | 1010.22        |
| LoPAL3        | Unigene.24577        | Phenylalanine ammonialyase            | 2272            | 708           | AtPAL1 (NP_181241) | 79.60           | 66.92                      | 9.44            | 0.52           |
| LoPAL4        | Unigene.26217        | Phenylalanine ammonialyase            | 2491            | 757           | AtPAL1 (NP_181241) | 60.72           | 146.21                     | 40.69           | 57.92          |
| LoCNL         | Unigene.28102        | Cinnamoyl-CoA ligase                  | 2138            | 525           | PhCNL (AEO52693)   | 61.99           | 1.77                       | 2165.45         | 380.15         |
| LoCHD1        | Unigene.29358        | Cinnamoyl-CoA hydratase/dehydrogenase | 2761            | 724           | PhCHD (AFS41246)   | 72.68           | 337.20                     | 591.76          | 968.25         |
| LoCHD2        | Unigene.3543         | Cinnamoyl-CoA hydratase/dehydrogenase | 2689            | 727           | AtMFP2 (At3g06860) | 74.72           | 71.57                      | 90.03           | 297.79         |
| LoKAT         | Unigene.18419        | 3-Ketoacyl CoA thiolase               | 1861            | 459           | PhKAT1 (ACV70032)  | 76.19           | 897.25                     | 3396.14         | 4025.46        |
| LoBALD        | Unigene.23108        | Benzaldehyde dehydrogenase            | 1930            | 531           | AmBALD (ACM8973)   | 79.48           | 30.84                      | 100.72          | 172.64         |
| LoSABATH1     | Unigene.7620         | SABATH methyltransferases             | 1367            | 356           | OsBSMT (XP_467504) | 40.69           | 0.00                       | 2.27            | 0.56           |
| LoSABATH2     | Unigene.29839        | SABATH methyltransferases             | 1490            | 359           | OsBSMT (XP_467504) | 39.36           | 0.82                       | 0.00            | 0.00           |
| <b>LoAAT1</b> | <b>Unigene.19741</b> | <b>Alcohol acyl transferase</b>       | <b>1905</b>     | <b>459</b>    | CbBEBT (AAN09796)  | <b>67.57</b>    | <b>2.68</b>                | <b>14339.57</b> | <b>5341.48</b> |
| LoAAT2        | Unigene.21917        | Alcohol acyl transferase              | 1495            | 447           | CbBEBT (AAN09796)  | 52.26           | 4.38                       | 30.33           | 18.75          |
| LoAAT3        | Unigene.22042        | Alcohol acyl transferase              | 1427            | 404           | CbBEBT (AAN09796)  | 49.61           | 0.70                       | 0.00            | 0.09           |
| LoPME         | Unigene.28525        | Pectin methylesterase                 | 1754            | 487           | AtPME6 (At1g23200) | 54.56           | 0                          | 3288.07         | 636.81         |

BM\_L and BM\_D represent the tepal in the blooming stage at the daytime (16:00) and dark (4:00 AM), respectively. RPKM: reads per kilobase of exon model per million mapped reads.

**Supplementary Table 4.** Primer sequences used in this study.

| <b>Gene</b>    | <b>Forward/reverse primer sequence (5'-3')</b>                                               | <b>Purpose</b>       |
|----------------|----------------------------------------------------------------------------------------------|----------------------|
| <i>LoAAT1</i>  | ATGGCATCATCCCTCACTTTCT<br>CTATAATTCCCTTTTACCCTTCG                                            | gene isolation       |
| <i>LoAAT1</i>  | <i>EcoRI</i> -GAATTC ATGGCATCATCCCTCACTTTCT<br><i>HindIII</i> -AAGCTTCGAGGGCAGAAGCAATAAACTGC | bacterial expression |
| <i>LoAAT1</i>  | ATTGTGGTGCCAGTTTGCTTGC<br>CCCTTTTACCCTTCGTTGAACTTC                                           | real-time PCR        |
| <i>LoGAPDH</i> | CACTGCTACTCAGAAAAC<br>ATCAACAACAGACACATC                                                     | real-time PCR        |
